# Supplementary material
Source: PubMed Central journal article supplement (PMC6683644)
Supplement: Supplemental_Material6.pdf [file Supplemental_Material6.pdf]

## Supplementary information

Table 1: Within-person correlations (*r*) between symptoms. \*\*\*:  $p < 0.001$ , \*\*:  $p < 0.01$ , \*:  $p < 0.05$ .

|                   | Pain in abdomen | Bloating | Nausea / Vomiting | Somatic symptoms | Headache | Gas  | Discomfort | Heartburn | Fatigue | Diarrhoea | Psychological distress | Belching |
|-------------------|-----------------|----------|-------------------|------------------|----------|------|------------|-----------|---------|-----------|------------------------|----------|
| Pain in abdomen   |                 | ***      | ***               | ***              | ***      | ***  | ***        | ***       | ***     | ***       | ***                    | ***      |
| Bloating          | 0.42            |          | ***               | ***              | ***      | ***  | ***        | ***       | ***     | **        | ***                    | ***      |
| Nausea / Vomiting | 0.36            | 0.23     |                   | ***              | ***      | ***  | **         | **        | ***     | ***       | ***                    | **       |
| Somatic symptoms  | 0.16            | 0.14     | 0.17              |                  | ***      | ***  | ***        | ***       | ***     | **        | ***                    | ***      |
| Headache          | 0.16            | 0.19     | 0.20              | 0.21             |          | ***  |            | *         | ***     |           | *                      |          |
| Gas               | 0.36            | 0.42     | 0.17              | 0.11             | 0.10     |      | ***        | ***       | **      | ***       | **                     | ***      |
| Discomfort        | 0.29            | 0.37     | 0.33              | 0.16             | 0.05     | 0.30 |            | **        | ***     | **        | ***                    | ***      |
| Heartburn         | 0.19            | 0.20     | 0.16              | 0.14             | 0.10     | 0.12 | 0.30       |           | **      | *         | **                     | ***      |
| Fatigue           | 0.14            | 0.16     | 0.20              | 0.33             | 0.27     | 0.08 | 0.15       | 0.13      |         | *         | ***                    | **       |
| Diarrhoea         | 0.25            | 0.12     | 0.15              | 0.09             | 0.09     | 0.09 | 0.14       | 0.10      | 0.06    |           |                        | *        |
| Psych. distress   | 0.15            | 0.13     | 0.18              | 0.20             | 0.12     | 0.11 | 0.41       | 0.10      | 0.23    | 0.05      |                        | **       |
| Belching          | 0.18            | 0.18     | 0.16              | 0.14             | 0.03     | 0.22 | 0.34       | 0.12      | 0.13    | 0.14      | 0.11                   |          |
